# Supplementary material for: Effect of counter-ions on the properties and performance of non-conjugated polyelectrolyte interlayers in solar cell and transistor devices
Source: Royal Society of Chemistry journal article supplement (doi:10.1039/c9ra04299g), 2019-01-01
Supplement: c9ra04299g1.pdf [file c9ra04299g1.pdf]

## Supporting Information for:

### Effect of counter-ions on the properties and performance of non-conjugated polyelectrolyte interlayers in solar cell and transistor devices

Ju Hwan Kang,<sup>a</sup> Yu Jung Park,<sup>a</sup> Myung Joo Cha,<sup>a</sup> Yeonjin Yi,<sup>b</sup> AeRan Song,<sup>c</sup> Kwun-Bum Chung,<sup>c</sup> Jung Hwa Seo<sup>\*,a</sup> and Bright Walker<sup>\*,d</sup>

<sup>a</sup>*Department of Materials Physics, Dong-A University, 49315, Republic of Korea*

<sup>b</sup>*Institute of Physics and Applied Physics, Yonsei University, 50 Yonsei-ro, Seodaemun-gu, Seoul 03722, Republic of Korea*

<sup>c</sup>*Division of Physics and Semiconductor Science, Dongguk University, Seoul, 04620, Republic of Korea*

<sup>d</sup>*Department of Chemistry, Kyung Hee University, 02453, Seoul, Republic of Korea*

#### 1. Preparation of Nonconjugated polyelectrolytes

**PEIH<sup>+</sup>Br<sup>-</sup> and PEIH<sup>+</sup>I<sup>-</sup>.** A solution of polyethyleneimine PEI in deionized water was made with a concentration of 0.25 g/mL. Aqueous solutions of acid (HI, HBr) were slowly added to the polymer solutions until test aliquots (5  $\mu$ L of polymer solution diluted in 1 mL water) reached a pH in the range of 5.0 to 5.5. In the case of PEIH<sup>+</sup>Br<sup>-</sup>, 1,800  $\mu$ L of PEI solution was neutralized with 491  $\mu$ L of concentrated (48%) HBr. In the case of PEIH<sup>+</sup>I<sup>-</sup>, 1,350  $\mu$ L of PEI solution was neutralized with 521  $\mu$ L of concentrated (57%) HI. The solutions were precipitated into isopropanol, re-dissolved in anhydrous methanol, precipitated in diethyl ether, and dried under vacuum yielding gummy solids.

**PEIH<sup>+</sup>BIm<sub>4</sub><sup>-</sup>.** Was prepared following a previously reported procedure.<sup>1</sup> The structure was confirmed by <sup>1</sup>HNMR in D<sub>2</sub>O, by comparing the PEI (Figure S1) starting material with the product PEIH<sup>+</sup>BIm<sub>4</sub><sup>-</sup> (Figure S2) which showed the appearance of 3 distinct resonances at 7.33, 7.06 and 6.88 ppm corresponding to the 3 unique protons on the tetraimidazolyl borate (BIm<sub>4</sub><sup>-</sup>) anion.

1. Kim, H.-B.; Yoon, Y. J.; Jeong, J.; Heo, J.; Jang, H.; Seo, J. H.; Walker, B.; Kim, J. Y., Peroptronic devices: perovskite-based light-emitting solar cells. *Energy Environ. Sci.* **2017**, *10* (9), 1950-1957.

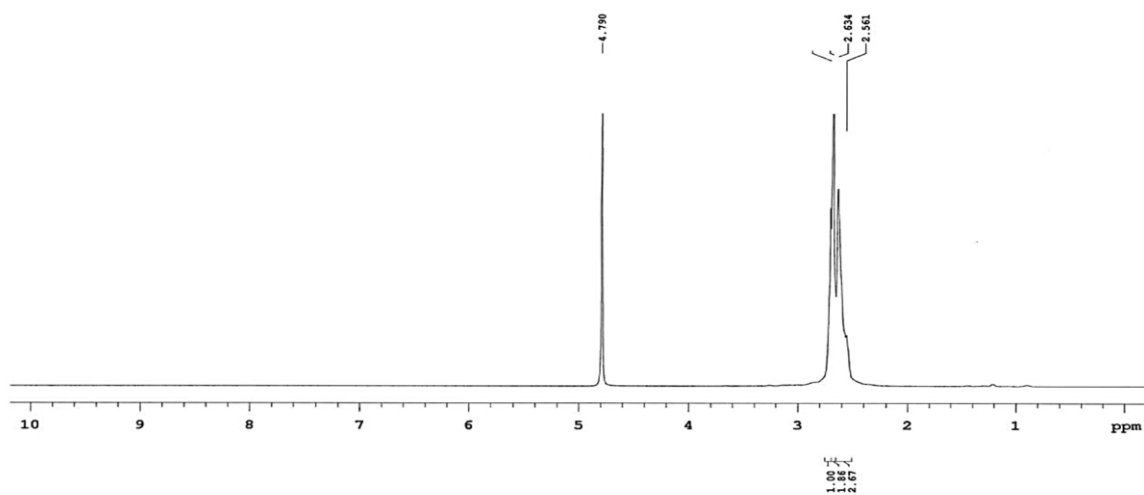

**Figure S1.**  $^1\text{H}$ NMR spectrum of PEI polymer in  $\text{D}_2\text{O}$ . The peak at 4.79 ppm corresponds to  $\text{H}_2\text{O}$ .

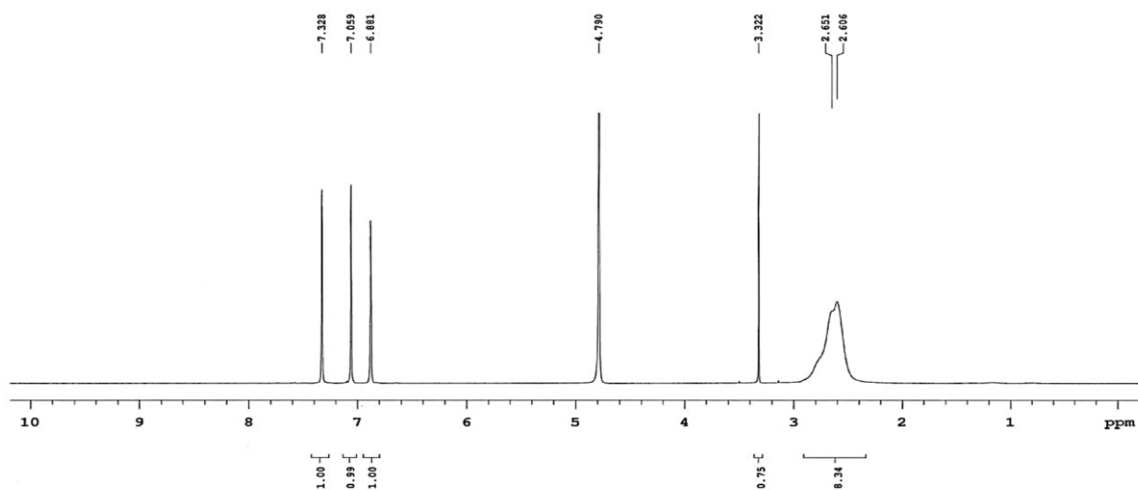

**Figure S2.**  $^1\text{H}$ NMR spectrum of  $\text{PEIH}^+\text{BI}_4^-$  polymer in  $\text{D}_2\text{O}$ . Peaks at 4.79 and 3.32 ppm correspond to residual  $\text{H}_2\text{O}$  and methanol, respectively.

## 2. Performance of P3HT:PC<sub>61</sub>BM solar cells with NPE interlayers

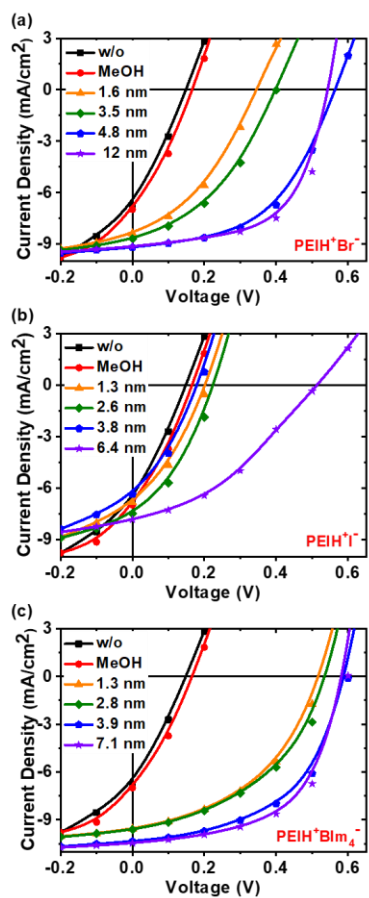

**Figure S3.** Current Density–Voltage curves of inverted P3HT:PC<sub>61</sub>BM solar cells with the NPE ETL layers (a) PEIH<sup>+</sup>Br<sup>-</sup>, (b) PEIH<sup>+</sup>I<sup>-</sup>, and (c) PEIH<sup>+</sup>BIm<sub>4</sub><sup>-</sup>.

**Table S1.** Summary of device characteristics of P3HT:PC<sub>61</sub>BM solar cells as a function of NPE thicknesses.

|                                                 | Concentrate (%) | Thickness (nm) | J <sub>sc</sub> (mA/cm <sup>2</sup> ) | V <sub>oc</sub> (V) | FF (%)   | PCE (%)   |      |
|-------------------------------------------------|-----------------|----------------|---------------------------------------|---------------------|----------|-----------|------|
|                                                 |                 |                |                                       |                     |          | Average   | Best |
| w/o                                             | -               | -              | 6.774±0.12                            | 0.15±0.012          | 29.4±1.9 | 0.24±0.09 | 0.30 |
| Methanol Treatment                              | -               | -              | 7.133±0.10                            | 0.17±0.007          | 33.2±1.5 | 0.31±0.12 | 0.39 |
| PEIH <sup>+</sup> Br <sup>-</sup>               | 0.005           | 1.6            | 8.387±0.11                            | 0.32±0.006          | 46.1±0.2 | 1.02±0.12 | 1.23 |
|                                                 | 0.01            | 3.5            | 8.692±0.09                            | 0.43±0.003          | 46.3±0.6 | 1.58±0.10 | 1.74 |
|                                                 | 0.05            | 4.8            | 9.985±0.12                            | 0.58±0.003          | 53.6±0.5 | 3.01±0.07 | 3.12 |
|                                                 | 0.1             | 12             | 9.923±0.08                            | 0.55±0.005          | 57.5±0.8 | 2.94±0.05 | 3.10 |
| PEIH <sup>+</sup> I <sup>-</sup>                | 0.005           | 1.3            | 6.842±0.18                            | 0.21±0.011          | 32.4±1.8 | 0.32±0.13 | 0.46 |
|                                                 | 0.01            | 2.6            | 7.493±0.15                            | 0.22±0.014          | 33.8±1.7 | 0.44±0.11 | 0.55 |
|                                                 | 0.05            | 3.8            | 6.361±0.21                            | 0.19±0.022          | 41.2±2.1 | 0.48±0.13 | 0.50 |
|                                                 | 0.1             | 6.4            | 7.837±0.08                            | 0.54±0.004          | 32.9±3.2 | 1.17±0.09 | 1.38 |
| PEIH <sup>+</sup> BIm <sub>4</sub> <sup>-</sup> | 0.005           | 1.3            | 9.563±0.17                            | 0.57±0.003          | 57.3±0.5 | 2.98±0.03 | 3.12 |
|                                                 | 0.01            | 2.8            | 9.601±0.12                            | 0.59±0.007          | 56.8±0.8 | 3.09±0.04 | 3.22 |
|                                                 | 0.05            | 3.9            | 10.34±0.08                            | 0.61±0.004          | 60.3±0.3 | 3.58±0.07 | 3.80 |
|                                                 | 0.1             | 7.1            | 10.45±0.06                            | 0.60±0.005          | 62.5±0.6 | 3.71±0.09 | 3.89 |

### 3. Output characteristics of IZO FETs with different thicknesses of PEIH<sup>+</sup>BIm<sub>4</sub><sup>-</sup>

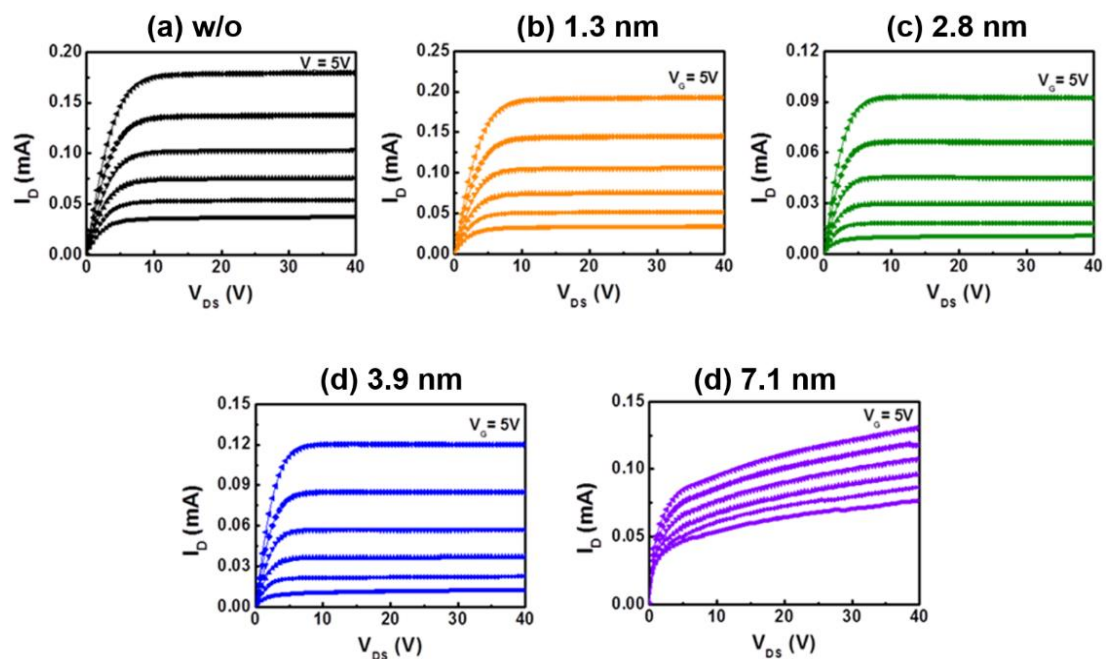

**Figure S4.** Output characteristics of n-type IZO FETs (a) without and (b)-(e) with PEIH<sup>+</sup>BIm<sub>4</sub><sup>-</sup> as a function of the film thicknesses. (1.3, 2.8, 3.9 and 7.1 nm)

#### 4. Au 4f XPS spectra of NPE films

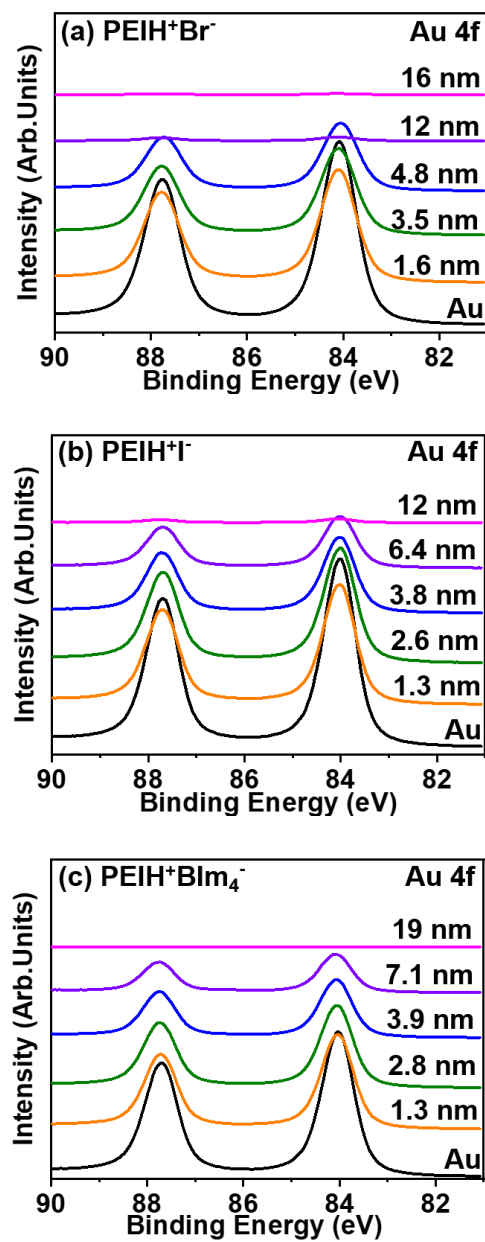

Figure S5. The XPS spectra of Au 4f core levels of (a) PEIH<sup>+</sup>Br<sup>-</sup>, (b) PEIH<sup>+</sup>I<sup>-</sup>, and (c) PEIH<sup>+</sup>BIm<sub>4</sub><sup>-</sup>.

It is necessary to know the exact thickness of the NPE layer in order to elucidate the electronic structure at the polymer/metal interface. However the thickness of the spin-coated film is generally have the value in few nanometers so, its hard to measure it accurately. In order to estimate the thickness more precisely, we performed the XPS measurement and calculated it by the attenuation of the Au 4f emission line associated with the substrate . The thickness ( $d$ ) of the each deposited layers is given by, <sup>1-4</sup>

$$d = -l \left[ \ln \left( \frac{I}{I_0} \right) \right] \quad (1)$$

where  $l$  is the mean free path of the emitted electrons,  $I$  is the intensity measured on each NPE layer and  $I_0$  is the intensity measured on the bare Au substrate. The ratio  $I/I_0$  was obtained from the Au 4f peak areas. The thicknesses are an average measurement of coverage and the thickness error is approximately  $\pm 10\%$  of the last digit.

1. N. Dam, M. Beerbom, J. Braunagel and R. Schlaf, *Journal of applied physics*, 2005, **97**, 024909.
2. W. M. Riggs and M. J. Parker, *Methods of Surface Analysis*, 1975, **1**.
3. J. H. Scofield, *Journal of Electron Spectroscopy and Related Phenomena*, 1976, **8**, 129-137.
4. I. S. Tilinin, A. Jablonski and W. Werner, *Progress in Surface Science*, 1996, **52**, 193-335.

## 5. AFM images of NPE films

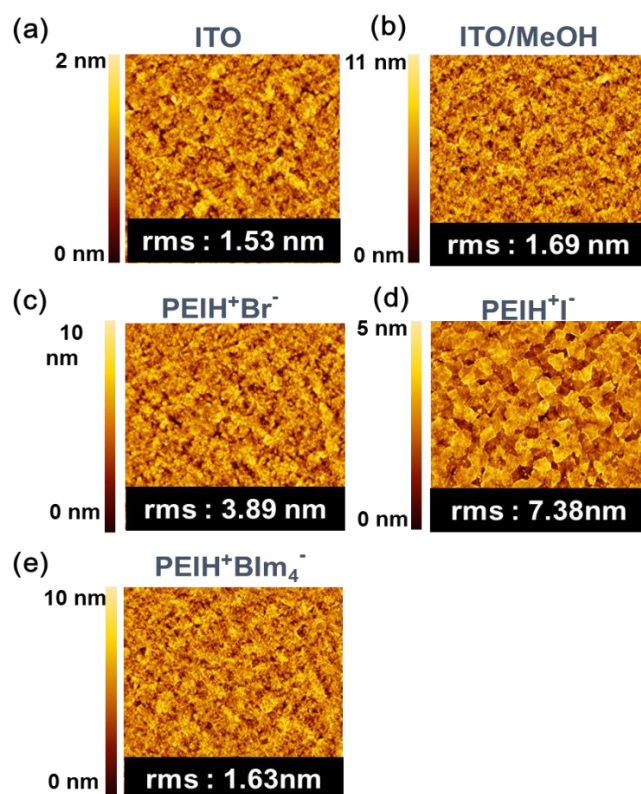

**Fig S6.** Surface topographic AFM images (size:  $5 \mu\text{m} \times 5 \mu\text{m}$ ) of (a) ITO, (b) ITO/MeOH treatment, (c) ITO/4.8 nm PEIH<sup>+</sup>Br<sup>-</sup>, (d) ITO/6.4 nm PEIH<sup>+</sup>I<sup>-</sup> and (e) ITO/7.1 nm PEIH<sup>+</sup>BIm<sub>4</sub><sup>-</sup> films.

In order to examine the morphological difference of NPEs, we measured NPE surface topography on ITO substrates using AFM. Thicknesses of NPEs are 4.8 nm for PEIH<sup>+</sup>Br<sup>-</sup>, 6.4 nm for PEIH<sup>+</sup>I<sup>-</sup> and 7.1 nm for PEIH<sup>+</sup>BIm<sub>4</sub><sup>-</sup>, respectively. Root mean square (RMS) from each image was summarized in Figure S5, which is the standard deviation of the surface profile from a mean surface level of zero over large area. Although there is no significant change in the surface topography of the four samples (Fig. S6 (a), (b), (c) and (e)), the RMS values show the PEIH<sup>+</sup>I<sup>-</sup> exhibit rougher surfaces than that of the PEIH<sup>+</sup>Br<sup>-</sup> and PEIH<sup>+</sup>BIm<sub>4</sub><sup>-</sup>.



## 6. Water contact measurements of NPE films

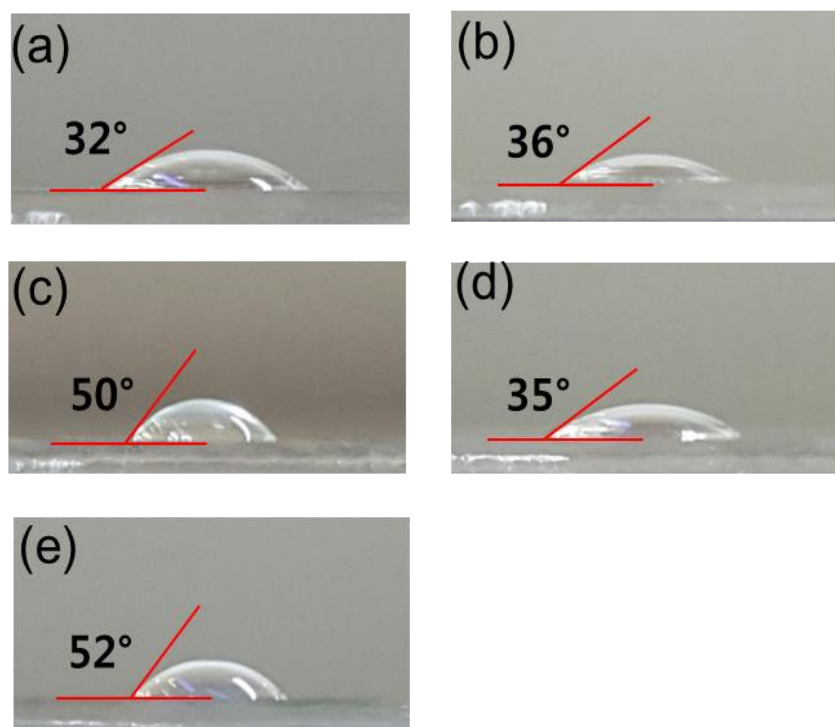

**Figure S7.** Photographs of water droplets on the surfaces of (a) ITO, (b) methanol, (c) PEIH<sup>+</sup>Br, (d) PEIH<sup>+</sup>I and (e) PEIH<sup>+</sup>BI<sub>m</sub><sup>-</sup> films deposited on the ITO substrates.
